# Supplementary material
Source: MDPI journal article supplement (https://www.mdpi.com/2075-163X/10/6/573)
Supplement: s1 [file s1]

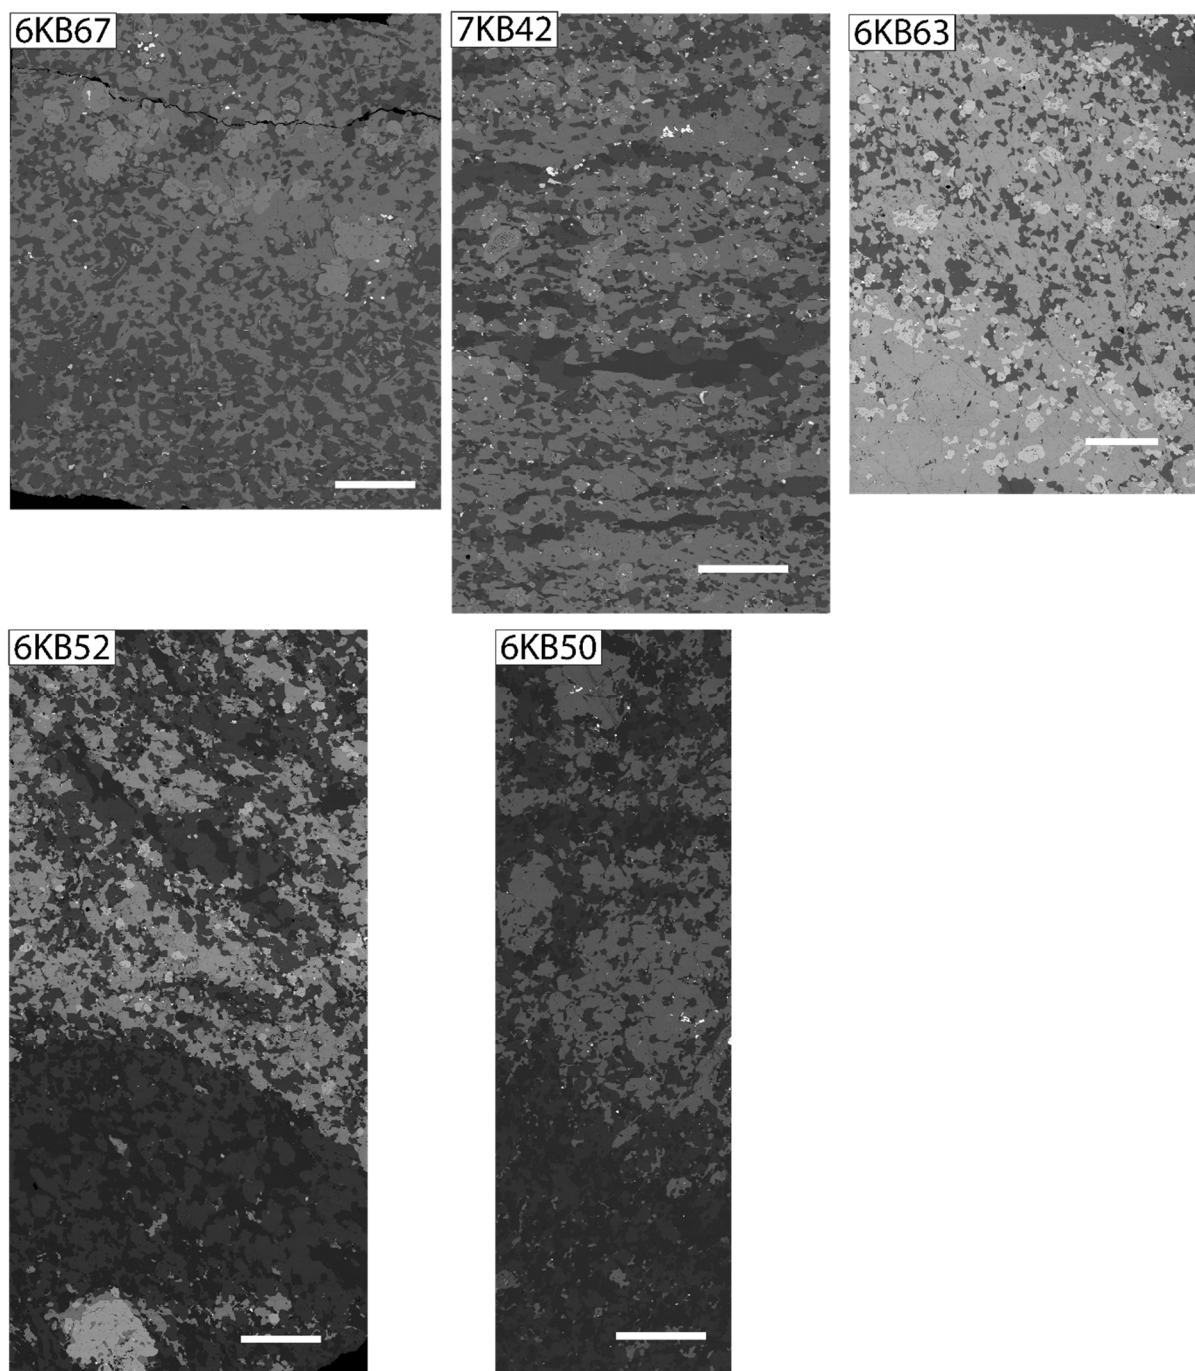

**Figure S1.** High-resolution back-scattered electron maps of the five Kapuskasing gneiss samples. Scale bars are 5 mm.
